# Supplementary material for: Morphology prediction for polymer blend thin films using machine learning
Source: Royal Society of Chemistry journal article supplement (doi:10.1039/d5sm00335k), 2025-01-01
Supplement: d5sm00335k2.xlsx [file d5sm00335k2.xlsx]

## Sheet: Sheet1
Morphology prediction for polymer blend thin films using machine learning
Bishnu R1, Rabibrata Mukherjee2, Nandini Bhandaru1*, Arnab Dutta1*
1Chemical Engineering Department, Birla Institute of Technology and Science (BITS) Pilani, Hyderabad Campus, Jawahar Nagar, Medchal District, Hyderabad-500078, Telangana, India
2Instability and Soft Patterning Laboratory, Department of Chemical Engineering,
Indian Institute of Technology (IIT) Kharagpur-721302, India
*Corresponding author: Email: nandini@hyderabad.bits-pilani.ac.in (Nandini), arnabdutta@hyderabad.bits-pilani.ac.in (Arnab). Tel: +9140 66303571 (Nandini), +9140 66303758 (Arnab).

## Sheet: Dataset
Sample No.	Concentration (%)	Composition	Polymer B Molecular weight (Da) *10^6	Substrate Surface Energy (mJ/m2) *10^2	Morphology Type
1	0.5	0.75	0.12	0.242	Column
2	0.5	0.5	0.12	0.242	Column
3	0.5	0.25	0.12	0.242	Hole
4	0.75	0.75	0.12	0.242	Column
5	0.75	0.5	0.12	0.242	Column
6	0.75	0.25	0.12	0.242	Hole
7	1	0.75	0.12	0.242	Column
8	1	0.5	0.12	0.242	Column
9	1	0.25	0.12	0.242	Hole
10	2	0.75	0.12	0.242	Column
11	2	0.5	0.12	0.242	Column
12	2	0.25	0.12	0.242	Hole
13	2	0.75	0.35	0.242	Column
14	2	0.5	0.35	0.242	Hole
15	2	0.25	0.35	0.242	Hole
16	3	0.25	0.12	0.242	Column
17	1	0.75	0.35	0.242	Column
18	1	0.5	0.35	0.242	Island
19	1	0.25	0.35	0.242	Hole
20	0.25	0.75	0.35	0.541	Column
21	0.25	0.5	0.35	0.541	Island
22	0.25	0.25	0.35	0.541	Hole
23	0.5	0.75	0.35	0.541	Column
24	0.5	0.5	0.35	0.541	Hole
25	0.5	0.25	0.35	0.541	Hole
26	2	0.75	0.35	0.541	Column
27	2	0.5	0.35	0.541	Island
28	2	0.25	0.35	0.541	Hole
29	2	0.8	0.35	0.541	Column
30	2	0.75	0.12	0.541	Column
31	2	0.5	0.12	0.541	Column
32	2	0.25	0.12	0.541	Island
33	1	0.75	0.12	0.541	Column
34	1	0.5	0.12	0.541	Column
35	1	0.25	0.12	0.541	Island
36	1	0.25	0.35	0.541	Hole
37	1	0.5	0.35	0.541	Island
38	1	0.75	0.35	0.541	Column
39	0.25	0.75	0.35	0.733	Column
40	0.25	0.5	0.35	0.733	Island
41	0.25	0.25	0.35	0.733	Hole
42	0.25	0.75	0.12	0.733	Column
43	0.25	0.5	0.12	0.733	Island
44	0.25	0.25	0.12	0.733	Island
45	0.5	0.75	0.35	0.733	Column
46	0.5	0.5	0.35	0.733	Island
47	0.5	0.25	0.35	0.733	Hole
48	0.75	0.75	0.12	0.733	Column
49	0.75	0.5	0.12	0.733	Column
50	0.75	0.25	0.12	0.733	Island
51	0.75	0.75	0.35	0.733	Column
52	0.75	0.5	0.35	0.733	Island
53	0.75	0.25	0.35	0.733	Hole
54	1	0.75	0.12	0.733	Column
55	1	0.5	0.12	0.733	Column
56	1	0.25	0.12	0.733	Island
57	1	0.75	0.35	0.733	Column
58	1	0.5	0.35	0.733	Island
59	1	0.25	0.35	0.733	Hole
60	2	0.75	0.12	0.733	Column
61	2	0.5	0.12	0.733	Column
62	2	0.25	0.12	0.733	Island
63	2	0.75	0.35	0.733	Column
64	2	0.5	0.35	0.733	Island
65	2	0.25	0.35	0.733	Hole
66	2	0.33	0.12	0.733	Island
67	3	0.75	0.12	0.733	Column
68	3	0.5	0.12	0.733	Column
69	3	0.25	0.12	0.733	Column
70	0.5	0.5	0.12	0.773	Hole
71	1	0.75	0.12	0.773	Column
72	1	0.5	0.12	0.773	Column
73	1	0.25	0.12	0.773	Hole
74	1	0.5	0.35	0.773	Island
75	1	0.25	0.35	0.773	Hole
76	2	0.75	0.12	0.773	Column
77	2	0.5	0.12	0.773	Column
78	2	0.25	0.12	0.773	Island
79	3	0.75	0.12	0.773	Column
80	3	0.5	0.12	0.773	Column
